# Supplementary material for: Excessive nitrogen application dampens antioxidant capacity and grain filling in wheat as revealed by metabolic and physiological analyses
Source: PubMed Central journal article supplement (PMC5324167; doi:10.1038/srep43363), 2017-02-24
Supplement: srep43363-s1.pdf [file srep43363-s1.pdf]

**Excessive nitrogen application dampens antioxidant capacity and grain filling in  
wheat as revealed by metabolic and physiological analyses**

Lingan Kong<sup>1</sup> \*, Yan Xie<sup>1</sup>, Ling Hu<sup>1,2</sup>, Jisheng Si<sup>1</sup> & Zongshuai Wang<sup>1</sup>

<sup>1</sup> Crop Research Institute, Shandong Academy of Agricultural Sciences, Jinan 250100, China

<sup>2</sup> College of Life Science, Shandong Normal University, Jinan 250014, China

Running title: Negative effects of excessive N on wheat yield

**\* Corresponding author:**

Lingan Kong, Ph.D.

Crop Research Institute

Shandong Academy of Agricultural Sciences

202 Gongyebei Road

Jinan City 250100

China

Tel.: 0086-531-83178123

Fax: 0086-531-83179088

E-mail address: [kongling-an@163.com](mailto:kongling-an@163.com)

### Supplementary Information

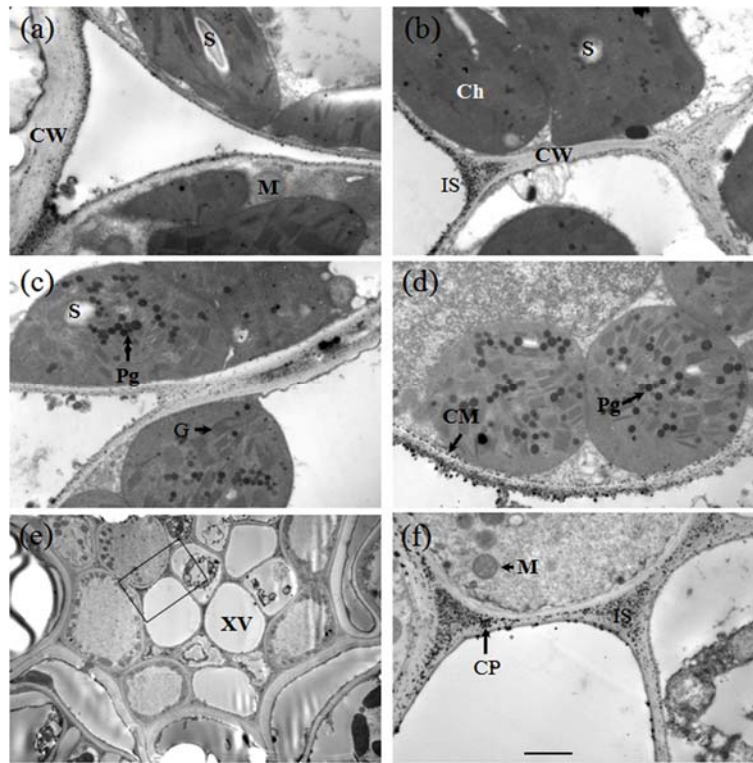

**Figure S1.** Detection of  $\text{H}_2\text{O}_2$  in flag leaves of wheat. The presence of  $\text{H}_2\text{O}_2$  is marked by electron-dense precipitates of cerium perhydroxides, which was localized to cell walls and the cell membrane and intercellular space of palisade tissues and vascular bundle. Bar: (a), (b), (c), (d) and (f): 1  $\mu\text{m}$ ; (e): 5  $\mu\text{m}$ . CP, cerium perhydroxides; Ch, chloroplast; CM, cell membrane; IS, intercellular space; M, mitochondria; XV, xylem vessel.

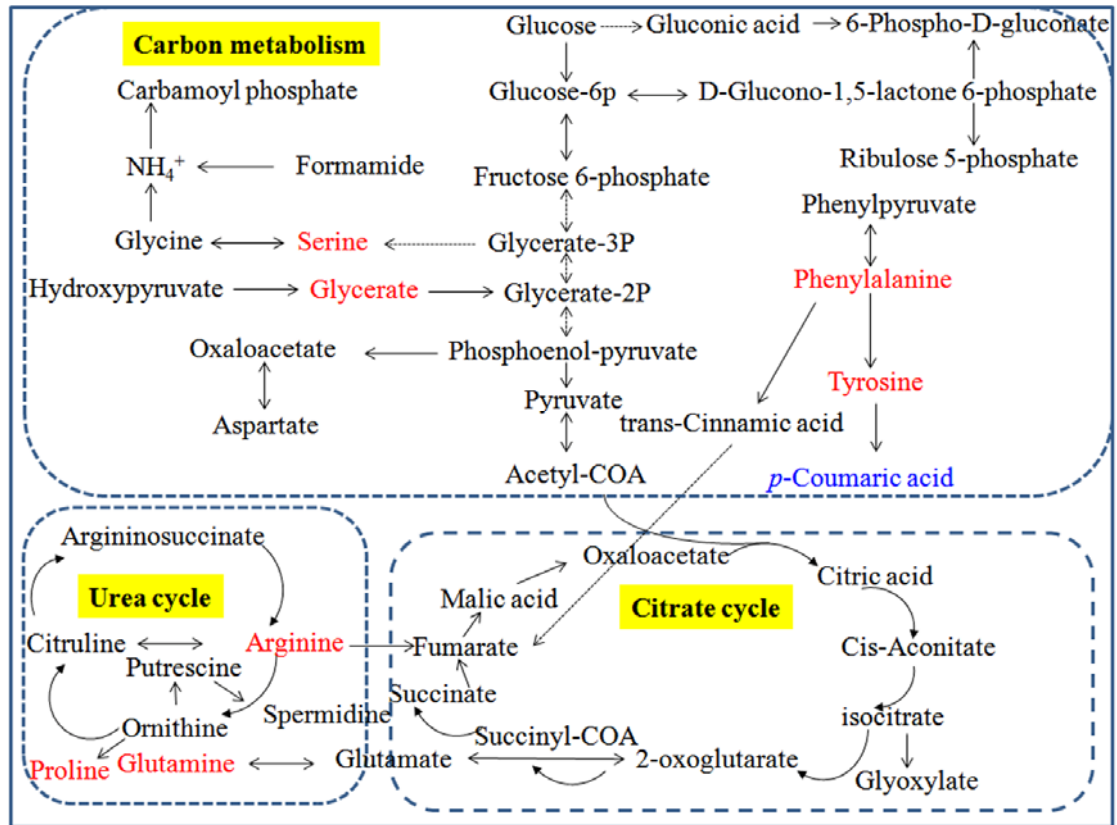

**Figure S2.** Comprehensive metabolic pathways involved in C metabolism and N metabolism in Nn and Ne flag leaves of wheat. The red font means the up-regulated metabolites for Ne treatment; the blue font means the down-regulated metabolites for Ne treatment.
